# Supplementary material for: Social Prescribing as ‘Social Cure’: A longitudinal study of the health benefits of social connectedness within a Social Prescribing pathway
Source: PubMed Central journal article supplement — J Health Psychol. 2020 Jul 23;27(2):386–96. doi: 10.1177/1359105320944991 (PMC8793307; doi:10.1177/1359105320944991), 2020-07-23
Supplement: Tables_R1.pdf [file Tables_R1.pdf]

## Social Prescribing as Social Cure

Supplementary Table 1  
*Characteristics of the participants at each time-point*

| Variable                                                | T0                                                            | T1                                                            | T2                                                            |
|---------------------------------------------------------|---------------------------------------------------------------|---------------------------------------------------------------|---------------------------------------------------------------|
| <b><i>n</i></b>                                         | 630                                                           | 178                                                           | 63                                                            |
| <b>Age</b>                                              | <i>M</i> = 52.74 yrs, <i>SD</i> = 14.79, <i>range</i> = 17-85 | <i>M</i> = 55.75 yrs, <i>SD</i> = 13.80, <i>range</i> = 19-85 | <i>M</i> = 57.13 yrs, <i>SD</i> = 15.17, <i>range</i> = 24-84 |
| <b>Gender</b>                                           | 285 m, 340 f, 5 unknown                                       | 86 m, 91 f, 1 unknown                                         | 32 m, 31 f                                                    |
| <b>No. of Group Memberships (0-10)</b>                  | <i>M</i> = 1.62, <i>SD</i> = 1.45                             | <i>M</i> = 2.21, <i>SD</i> = 1.87                             | <i>M</i> = 1.76, <i>SD</i> = 1.98                             |
| <b>Community Belonging (1-4)</b>                        | <i>M</i> = 2.71, <i>SD</i> = 1.09                             | <i>M</i> = 2.75, <i>SD</i> = 1.08                             | <i>M</i> = 2.70, <i>SD</i> = 1.00                             |
| <b>Social Support (1-5)</b>                             | <i>M</i> = 3.47, <i>SD</i> = 1.19                             | <i>M</i> = 3.69, <i>SD</i> = 1.11                             | <i>M</i> = 3.60, <i>SD</i> = 1.14                             |
| <b>Loneliness (1-5)</b>                                 | <i>M</i> = 2.42, <i>SD</i> = 1.18                             | <i>M</i> = 2.35, <i>SD</i> = 1.00                             | <i>M</i> = 2.41, <i>SD</i> = 1.17                             |
| <b>Health-Related QoL (-0.59-1)</b>                     | <i>M</i> = 0.61, <i>SD</i> = 0.32                             | <i>M</i> = 0.61, <i>SD</i> = 0.33                             | <i>M</i> = 0.59, <i>SD</i> = 0.36                             |
| <b>Relationship (0 = no, 1 = yes)</b>                   | 0 = 257, 1 = 373                                              | 0 = 79, 1 = 99                                                | 0 = 25, 1 = 38                                                |
| <b>Education (0 = none, 1 = schl/coll, 2 = uni/wrk)</b> | 0 = 69, 1 = 276, 2 = 285                                      | 0 = 21, 1 = 76, 2 = 81                                        | 0 = 9, 1 = 26, 2 = 28                                         |

## Social Prescribing as Social Cure

Supplementary Table 2

T0 ( $n = 630$ ): Descriptive statistics and correlations

| Variable                                                                                             | 1       | 2       | 3       | 4       | 5      | 6    | 7   | 8   | 9 |
|------------------------------------------------------------------------------------------------------|---------|---------|---------|---------|--------|------|-----|-----|---|
| <b>1. No. of Groups</b><br>(0-10; $M = 1.62$ , $SD = 1.45$ )                                         | -       |         |         |         |        |      |     |     |   |
| <b>2. Community Belonging</b><br>(1-4; $M = 2.71$ , $SD = 1.09$ )                                    | .31***  | -       |         |         |        |      |     |     |   |
| <b>3. Social Support</b><br>(1-5; $M = 3.47$ , $SD = 1.19$ , $\alpha = .87$ )                        | .14***  | .38***  | -       |         |        |      |     |     |   |
| <b>4. Loneliness</b><br>(1-5; $M = 2.42$ , $SD = 1.18$ , $\alpha = .90$ )                            | -.19*** | -.43*** | -.50*** | -       |        |      |     |     |   |
| <b>5. Health-Related Quality of Life</b><br>(-0.59-1.00; $M = 0.60$ , $SD = 0.32$ , $\alpha = .69$ ) | .11**   | .22***  | .21***  | -.33*** | -      |      |     |     |   |
| <b>6. Age</b><br>(17-85; $M = 52.74$ , $SD = 14.79$ )                                                | .17***  | .15***  | .09*    | -.21*** | -.003  | -    |     |     |   |
| <b>7. Gender</b><br>(Male = 1, Female = 2)                                                           | .04     | .03     | -.07†   | .07†    | -.08*  | -.03 | -   |     |   |
| <b>8. Relationship</b><br>(Yes = 1, No = 0)                                                          | .09*    | .18***  | .13***  | -.31*** | .15*** | .01  | .01 | -   |   |
| <b>9. Education</b><br>(1 = none, 2 = sch/coll, 3 = uni/wrk)                                         | .19***  | .06*    | .01     | -.05    | .13*** | .05  | .05 | .06 | - |

Note. \*\*\* $p \leq .001$ , \*\*  $p < .01$ , \*  $p < .05$ , †  $p < .10$

# Social Prescribing as Social Cure

Supplementary Table 3

T0/T1 (n = 178): Descriptive statistics and inter-correlations for key variables

| Variable                                                                            | 1       | 2      | 3     | 4       | 5       | 6       | 7       | 8       | 9       | 10     | 11    | 12   | 13  | 14  |
|-------------------------------------------------------------------------------------|---------|--------|-------|---------|---------|---------|---------|---------|---------|--------|-------|------|-----|-----|
| <b>1. Change in No. of Groups</b> (T0-T1, $M = 0.33$ , $SD = 2.15$ )                | -       |        |       |         |         |         |         |         |         |        |       |      |     |     |
| <b>2. No. of Groups T0</b> (1-10, $M = 1.89$ , $SD = 1.59$ )                        | -.54*** | -      |       |         |         |         |         |         |         |        |       |      |     |     |
| <b>3. No. of Groups T1</b> (1-10, $M = 2.21$ , $SD = 1.87$ )                        | .69***  | .23**  | -     |         |         |         |         |         |         |        |       |      |     |     |
| <b>4. Community Belonging T0</b> (1-4, $M = 2.72$ , $SD = 1.12$ )                   | -.16*   | .31**  | .08   | -       |         |         |         |         |         |        |       |      |     |     |
| <b>5. Community Belonging T1</b> (1-4, $M = 2.75$ , $SD = 1.08$ )                   | .10     | .14†   | .24** | .44***  | -       |         |         |         |         |        |       |      |     |     |
| <b>6. Social Support T0</b> (1-5, $M = 3.61$ , $SD = 1.13$ , $\alpha = .86$ )       | -.08    | .15†   | .03   | .30***  | .30***  | -       |         |         |         |        |       |      |     |     |
| <b>7. Social Support T1</b> (1-5, $M = 3.69$ , $SD = 1.11$ , $\alpha = .89$ )       | -.10    | .07    | .05   | .23**   | .45***  | .58***  | -       |         |         |        |       |      |     |     |
| <b>8. Loneliness T0</b> (1-5, $M = 2.42$ , $SD = 1.13$ , $\alpha = .88$ )           | .15     | -.20** | -.001 | -.38*** | -.29*** | -.42*** | -.32*** | -       |         |        |       |      |     |     |
| <b>9. Loneliness T1</b> (1-5, $M = 2.35$ , $SD = 1.00$ , $\alpha = .87$ )           | .06     | -.15*  | -.06  | -.25**  | -.40*** | -.30*** | -.47*** | .44***  | -       |        |       |      |     |     |
| <b>10. Quality of Life T0</b> (-0.59-1, $M = 0.57$ , $SD = 0.35$ , $\alpha = .72$ ) | -.05    | .03    | -.03  | .16*    | .09     | .18*    | .18*    | -.28**  | -.22**  | -      |       |      |     |     |
| <b>11. Quality of Life T1</b> (-0.59-1, $M = 0.61$ , $SD = 0.33$ , $\alpha = .74$ ) | -.08    | .14†   | .03   | .21**   | .22**   | .16*    | .19*    | -.25**  | -.30*** | .68*** | -     |      |     |     |
| <b>12. Age</b> ( $M = 55.75$ , $SD = 13.80$ )                                       | -.09    | .19*   | .07   | .19*    | .08     | .15*    | .15*    | -.26**  | -.22**  | .01    | .06   | -    |     |     |
| <b>13. Gender</b> (1 = male, 2 = female)                                            | .01     | .14†   | .13†  | -.03    | -.04    | -.07    | -.03    | -.02    | -.11    | -.06   | -.03  | .10  | -   |     |
| <b>13. Relationship</b> (0 = no, 1 = yes)                                           | -.03    | .07    | .02   | .06     | .23**   | .08     | .13†    | -.37*** | -.22**  | .04    | .04   | .07  | .08 | -   |
| <b>14. Education</b> (1 = none, 2 = sch/coll, 3 = uni/wrk)                          | -.06    | .23**  | .13†  | .10     | .03     | .05     | -.07    | -.08    | -.11    | .20**  | .23** | .15† | .09 | .04 |

Note. \*\*\*  $p < .001$ , \*\*  $p < .01$ , \*  $p < .05$ , †  $p < .10$ .

## Social Prescribing as Social Cure

Supplementary Table 4

*T1/T2 (n =63): Descriptive statistics and inter-correlations for Number of Group Memberships, Health-Related Quality of Life, Age, and Gender*

| Variable                                                                              | 1     | 2   | 3      | 4    | 5    | 6   | 7    | 8 |
|---------------------------------------------------------------------------------------|-------|-----|--------|------|------|-----|------|---|
| <b>1. No. of Groups T1</b><br>(1-10, $M = 2.77$ , $SD = 1.63$ )                       | -     |     |        |      |      |     |      |   |
| <b>2. No. of Groups T2</b><br>(1-10, $M = 1.53$ , $SD = 1.30$ )                       | .45** | -   |        |      |      |     |      |   |
| <b>3. Quality of Life T1</b><br>(-0.59-1, $M = 0.56$ , $SD = 0.38$ , $\alpha = .80$ ) | .15   | .18 | -      |      |      |     |      |   |
| <b>4. Quality of Life T2</b><br>(-0.59-1, $M = .59$ , $SD = 0.37$ , $\alpha = .77$ )  | .06   | .03 | .65*** | -    |      |     |      |   |
| <b>5. Age</b><br>( $M = 57.09$ , $SD = 15.58$ )                                       | .08   | .17 | .19    | .003 | -    |     |      |   |
| <b>6. Gender</b><br>(1 = male, 2 = female)                                            | .22   | .18 | -.01   | -.03 | .12  | -   |      |   |
| <b>7. Relationship</b><br>(0 = no, 1 = yes)                                           | .36*  | .11 | .01    | .10  | .08  | .08 | -    |   |
| <b>8. Education</b><br>(1 = none, 2 = sch/coll, 3 = uni/wrk)                          | .30*  | .05 | .26†   | .02  | .31* | .24 | -.12 | - |

Note. \*\*\*  $p < .001$ , \*\*  $p < .01$ , \*  $p < .05$ , †  $p < .10$ .
